# Supplementary material
Source: publisher figshare collection journal article supplement (https://karger.figshare.com/ndownloader/files/8955955)
Supplement: Supplementary file 1 [file 8955955]

## Erratum

---

In the printed version of the article ‘Paclitaxel, Ifosfamide and Cisplatin (TIP) Beyond Its Original Indication for Salvage Treatment of Germ Cell Tumors’ by Voss, M.H. and Feldman, D.R. in *Onkologie* 2011;34:410-411 (DOI:10.1159/000331699) there was a mistake. The first sentence of the second paragraph should read:

The two most commonly used salvage CDCT regimens include VeIP (*vinblastine*, ifosfamide and cisplatin) and TIP (paclitaxel, ifosfamide and cisplatin).
